# Supplementary material
Source: Royal Society of Chemistry journal article supplement (doi:10.1039/d6lc00201c)
Supplement: d6lc00201c1.xlsx [file d6lc00201c1.xlsx]

## Sheet: Blad1
Name	Short Name	MRM transition	IS	MRM transition	MS polarity
Tryptamin	Tra	161,1>144,1	d2-Tra	165,1>148,1	+
Tryptophan	Trp	205,2>146,1	d5-Trp	210,2>150,1	+
trans-zeatin	tZ	220,1>136,1	13C5-tZ	225,1>141,1	+
Dihydrozeatin	DHZ	222,1>136,1	d3-DHZ	225,1>136,1	+
cis-zeatin	cZ	220,1>136,1	13C5-cZ	225,1>141,1	+
oxIAA-glucose	oxIAA-Glc	192,1>146,1	13C6-oxIAA-Glc	198,2>152,1	+
trans-zeatin riboside	tZR	352,2>220,1	d5-tZR	357,2>225,1	+
Dihydrozeatin riboside	DHZR	354,2>222,1	d3-tZR	357,2>225,1	+
cis-zeatin riboside	cZR	352,2>220,1	d5-tZR	357,2>225,1	+
Anthranilic acid	ANT	138,1>120,1	13C6-ANT	142,1>124,1	+
Indole-3-acetamide	IAM	175,1>130,1	d5-IAM	180,2>134,1	+
2-oxindole-3-acetic acid	oxIAA	192,1>146,1	13C6-oxIAA	198,2>152,1	+
Isopentenyladenine	iP	204,2>136,1	d6-iP	210,2>137,1	+
IAA-Glucose	IAA-Glc	176,6>130,1	13C6-IAA-Glc	182,1>136,1	+
IAA-Aspartate	IAAsp	291,2>130,1	13C6-IAAsp	297,2>136,1	+
Gibberellin A3	GA3	345,1>239,1	d2-GA1	349,1>261,1	-
Gibberellin A1	GA1	347,1>259,1	d2-GA1	349,1>261,1	-
IAA-Glutamate	IAGlu	305,2>130,1	13C6-IAGlu	311,2>136,1	+
Isopentenyladenosine	iPR	336,3>204,1	d6-iPR	342,3>210,1	+
Indole-3-acetic acid	IAA	176,6>130,1	13C6-IAA	182,1>136,1	+
Abscisic acid	ABA	263,2>153,1	d6-ABA	269,2>159,1	-
Salicylic acid	SA	137,1>92,8	13C6-SA	143,0>98,8	-
Indole-3-acetonitrile	IAN	157,1>130,1	d4-IAN	161,2>134,1	+
Jasmonic acid	JA	209,2>58,8	d6-JA	215,2>58,8	-
Gibberellin A7	GA7	329,1>223.1	d2-GA4	333,1>289,1	-
Gibberellin A4	GA4	331,1>287,1	d2-GA4	333,1>289,1	-
Jasmonoyl-L-isoleucine	JA-Ile	324,3>151,2	d2-JA-Ile	326,3>151,2	+
Brassinolide	BL	481,1>445,1	d3-BL	484,1>448,1	+
Castasterone	CS	465,1>429,1	d3-CS	468,1>432,1	+
cis-12-oxo-phytodienoic acid	cisOPDA	293,3>275,3	d5-cisOPDA	298,3>279,3	+
