# Supplementary material
Source: Royal Society of Chemistry journal article supplement (doi:10.1039/d6lc00201c)
Supplement: d6lc00201c2.xlsx [file d6lc00201c2.xlsx]

## Sheet: Blad1
Conc fmol/sample			HMDB	HMDB0000303	HMDB0000929	HMDB0304506	HMDB0304291	HMDB0000197	HMDB0036093	HMDB0001895	HMDB0032797	HMDB0303944	HMDB0302724
			Full name	Tryptamin	Tryptophan	trans-zeatin riboside	cis-zeatin riboside	Indole-3-acetic acid	Abscisic acid	Salicylic acid	Jasmonic acid	Jasmonoyl-L-isoleucine	cis-12-oxo-phytodienoic acid
Metadata - tomato sap samples			Short name	TRA	TRP	tZR	cZR	IAA	ABA	SA	JA	JA-Ile	cisOPDA
Sample Identifier	Organism	Sample volume (µL)	runorder	Calc. Conc.	Calc. Conc.	Calc. Conc.	Calc. Conc.	Calc. Conc.	Calc. Conc.	Calc. Conc.	Calc. Conc.	Calc. Conc.	Calc. Conc.
Plant 0 h 1	Tomato	4 - 5 uL	19	3.964	390.396	0.014	<LOQ	27.628	1.626	1.961	<LOQ	<LOQ	15.25
Plant 0 h 2	Tomato	2 - 2,5 uL	20	3.725	93.691	0.008	<LOQ	2.784	4.221	4	0.22	<LOQ	6.929
Plant 0 h 3	Tomato	4,5 - 8 uL	21	3.553	11.135	0.01	<LOQ	0.586	0.469	2.21	<LOQ	<LOQ	6.489
Plant 20 min 1	Tomato	4,5 - 8 uL	22	9.963	339.546	0.054	0.009	1.458	1.824	2.34	<LOQ	<LOQ	22.305
Plant 20 min 2	Tomato	4,5 - 8 uL	23	24.02	858.87	0.013	0.009	0.644	0.134	2.065	<LOQ	<LOQ	15.839
Plant 20 min 3	Tomato	4,5 - 8 uL	24	16.354	1119.55	0.016	0.006	0.209	0.265	2.468	<LOQ	<LOQ	13.99
Plant 140 min 1	Tomato	4,5 - 8 uL	25	7.908	921.098	0.01	<LOQ	0.325	0.829	1.938	<LOQ	<LOQ	13.628
Plant 140 min 2	Tomato	4,5 - 8 uL	26	14.19	1084.46	0.021	0.009	0.488	0.904	2.503	<LOQ	<LOQ	20.721
Plant 140 min 3	Tomato	4,5 - 8 uL	27	11.129	728.349	<LOQ	<LOQ	0.284	0.688	1.21	<LOQ	<LOQ	0.496
Plant 5 h 1	Tomato	4,5 - 8 uL	28	20.135	206.67	0.086	0.01	0.473	1.836	1.676	<LOQ	<LOQ	25.493
Plant 5 h 2	Tomato	4,5 - 8 uL	29	16.218	1368.16	0.013	0.006	0.298	0.308	1.266	<LOQ	<LOQ	14.21
Plant 5 h 3	Tomato	4,5 - 8 uL	30	24.35	1105.54	0.006	<LOQ	0.284	1.189	1.765	<LOQ	<LOQ	7.698
Plant 24h 1	Tomato	4,5 - 8 uL	31	13.759	649.849	0.011	0.008	0.324	0.663	3.104	<LOQ	<LOQ	8.166
Plant 24h 2	Tomato	4,5 - 8 uL	32	7.034	653.719	<LOQ	<LOQ	0.204	0.133	3.08	<LOQ	<LOQ	<LOQ
Plant 24h 3	Tomato	4 - 5 uL	33	3.406	393.128	0.009	<LOQ	0.143	0.395	2.506	<LOQ	<LOQ	10.868
Plant 7 days 1	Tomato	4,5 - 8 uL	34	3.771	856.371	0.006	<LOQ	0.141	0.28	6.025	<LOQ	<LOQ	3.341
Plant 7 days 2	Tomato	4,5 - 8 uL	35	3.555	209.505	0.026	0.006	1.543	2.403	5.213	<LOQ	<LOQ	8.169
Plant 7 days 3	Tomato	4,5 - 8 uL	36	2.925	348.374	0.011	<LOQ	<LOQ	0.419	3.393	<LOQ	<LOQ	2.898
Destructive 1	Tomato	7	37	4.946	223.457	0.003	0.002	0.526	0.619	2.165	0.899	0.01	1.225
Destructive 2	Tomato	7	38	10.519	604.723	0.009	0.003	0.764	0.493	2.412	0.363	0.009	1.126
Destructive 3	Tomato	7	39	1.662	48.945	0.014	0.003	0.702	0.857	10.915	3.179	0.053	3.641
Conc pmol/µL
Metadata - phytohormone mix				tZR	IAA	ABA	SA	JA
Sample Identifier	sample type	sample volume (µl)	runorder	Calc. Conc.	Calc. Conc.	Calc. Conc.	Calc. Conc.	Calc. Conc.
t = 0; 1	hormone mix in paper	7	26	0.056	0.008	0.025	0.823	0.133
t = 0; 2	hormone mix in paper	7	30	0.066	0.01	0.029	0.498	0.156
t = 0; 3	hormone mix in paper	7	27	0.067	0.01	0.03	0.302	0.156
t = 0; 4	hormone mix in paper	7	29	0.063	0.009	0.027	0.179	0.145
t = 0; 5	hormone mix in paper	7	28	0.067	0.01	0.029	0.176	0.156
t = 20 min; 1	hormone mix in paper	7	25	0.071	0.009	0.032	0.457	0.166
t = 20 min; 2	hormone mix in paper	7	22	0.075	0.01	0.033	0.329	0.179
t = 20 min; 3	hormone mix in paper	7	23	0.073	0.009	0.033	0.17	0.173
t = 20 min; 4	hormone mix in paper	7	24	0.075	0.01	0.034	0.171	0.178
t = 20 min; 5	hormone mix in paper	7	21	0.073	0.009	0.032	0.204	0.172
t = 2h, 20 min; 1	hormone mix in paper	7	16	0.075	0.01	0.033	0.683	0.153
t = 2h, 20 min; 2	hormone mix in paper	7	19	0.079	0.01	0.035	1.138	0.158
t = 2h, 20 min; 3	hormone mix in paper	7	20	0.081	0.011	0.036	0.523	0.163
t = 2h, 20 min; 4	hormone mix in paper	7	17	0.081	0.01	0.035	0.282	0.164
t = 2h, 20 min; 5	hormone mix in paper	7	18	0.081	0.01	0.036	0.22	0.175
t = 5h; 1	hormone mix in paper	7	12	0.082	0.011	0.036	1.094	0.172
t = 5h; 2	hormone mix in paper	7	11	0.067	0.008	0.03	0.44	0.143
t = 5h; 3	hormone mix in paper	7	15	0.074	0.009	0.032	0.281	0.153
t = 5h; 4	hormone mix in paper	7	14	0.074	0.009	0.032	0.192	0.145
t = 5h; 5	hormone mix in paper	7	13	0.074	0.009	0.032	0.164	0.144
t = 24h; 1	hormone mix in paper	7	8	0.077	0.01	0.031	1.011	0.149
t = 24h; 2	hormone mix in paper	7	10	0.078	0.01	0.031	0.28	0.151
t = 24h; 3	hormone mix in paper	7	7	0.072	0.009	0.03	0.221	0.148
t = 24h; 4	hormone mix in paper	7	9	0.07	0.009	0.028	0.166	0.137
t = 24h; 5	hormone mix in paper	7	6	0.075	0.009	0.04	0.166	0.148
t = 7 days; 1	hormone mix in paper	7	3	0.073	0.008	0.028	0.528	0.141
t = 7 days; 2	hormone mix in paper	7	4	0.074	0.008	0.027	0.258	0.135
t = 7 days; 3	hormone mix in paper	7	1	0.073	0.008	0.027	1.019	0.142
t = 7 days; 4	hormone mix in paper	7	5	0.078	0.008	0.029	0.424	0.165
t = 7 days; 5	hormone mix in paper	7	2	0.077	0.009	0.028	0.586	0.14
