# Supplementary material
Source: Royal Society of Chemistry journal article supplement (doi:10.1039/d6lc00201c)
Supplement: d6lc00201c3.pdf [file d6lc00201c3.pdf]

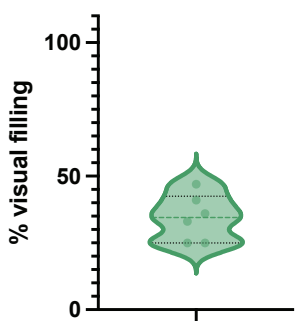

Mean: 34.5%  
SD: 8.8%  
CV%: 25.4%

3 uL

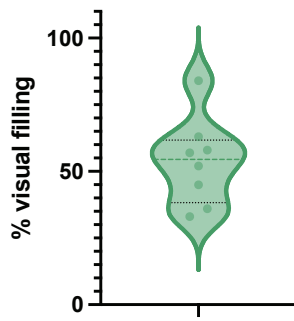

Mean: 53.5%  
SD: 16.27%  
CV%: 30.42%

4 uL

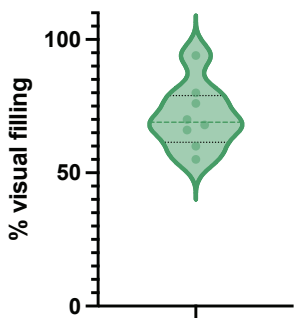

Mean: 71.1%  
SD: 12.2%  
CV%: 17.2 %

5 uL

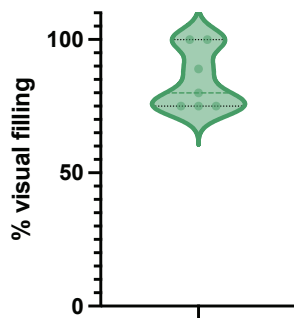

Mean: 84.9%  
SD: 11.5%  
CV%: 13.5%

6 uL

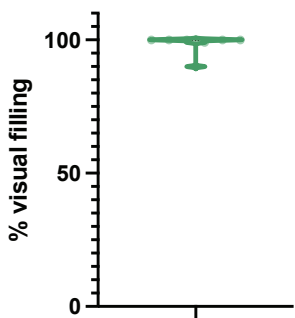

Mean: 98.4%  
SD: 3.7%  
CV%: 3.8%

7 uL

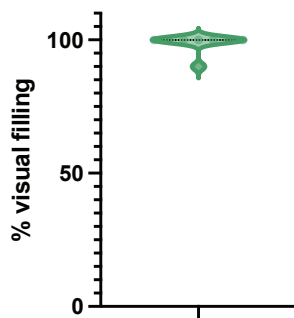

Mean: 98.8%  
SD: 3.5%  
CV%: 3.6%

8 uL

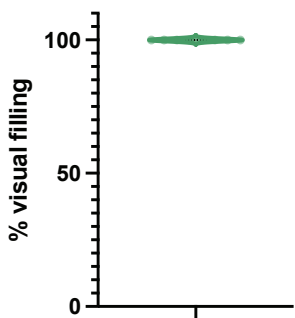

Mean: 100%  
SD: 0%  
CV%: 0%

9 uL

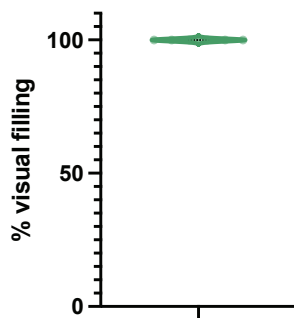

Mean: 100%  
SD: 0%  
CV%: 0%

10 uL
