# Supplementary material
Source: Royal Society of Chemistry journal article supplement (doi:10.1039/d6lc00201c)
Supplement: d6lc00201c7.pdf [file d6lc00201c7.pdf]

### Supplementary Figure legends

Fig. S1 Artificial phytohormone stocks were diluted and analyzed at three different concentrations (0.01, 0.1, and 1 pmol/ $\mu$ L). Phytohormone mixture (PHM) (45  $\mu$ L) was diluted with IS (5  $\mu$ L) and analyzed as is. The detected concentration after 10 days is shown for each dilution. The recovery (%) of stocks stored in fridge compared to at -80C° is indicated above each dilution.

Fig.S2. The phytohormonal concentrations in the microfluidic device samples and the destructive sap control samples plotted as averages. The error bars for the microfluidic device samples indicate the max and min concentrations obtained from the volume range the samples were collected in.

Fig. S3. The visually observed filling for 1-8  $\mu$ Ls of pipetted liquid (DI water) which was collected into the device. The plots depict the detected values as percentage filling as well as the mean, standard deviation, and coefficient of variation for all volumes.

Fig.S4. The evaporation time for four evaluated microfluidic sampling devices using DI water, demined using gravimetric evaluations. The rates of evaporation are depicted in the plot.
