# Supplementary material
Source: Royal Society of Chemistry journal article supplement (doi:10.1039/d6lc00201c)

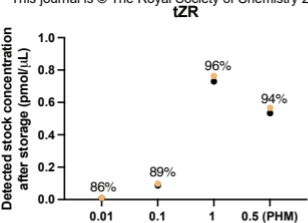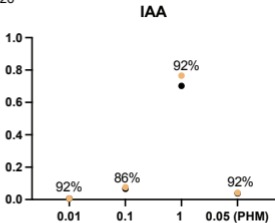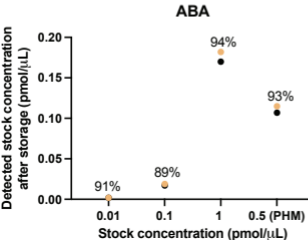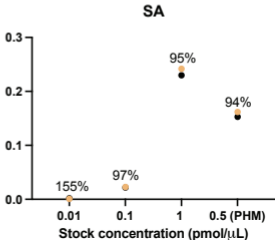

Supplement: d6lc00201c2.pdf [file d6lc00201c2.pdf]

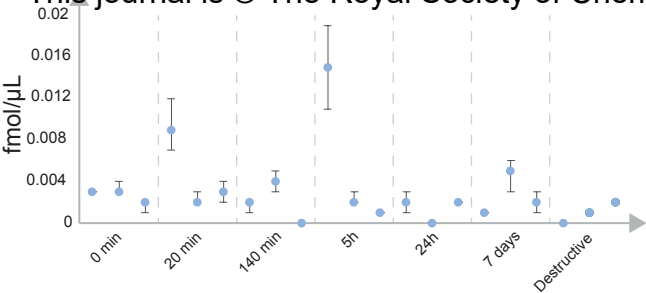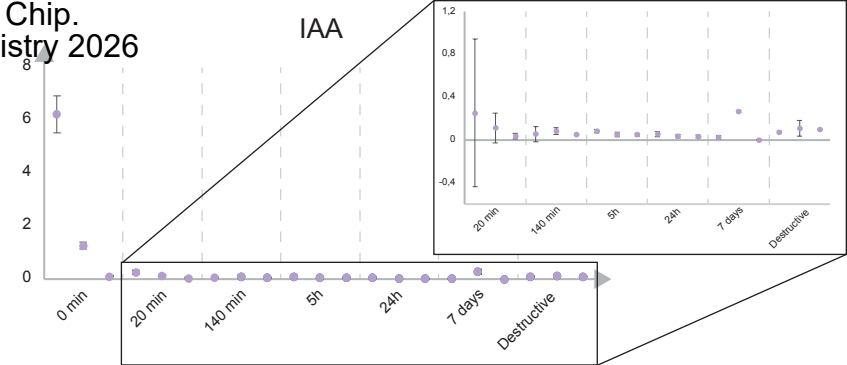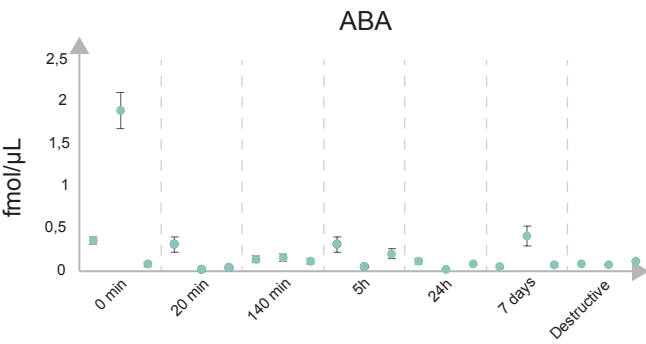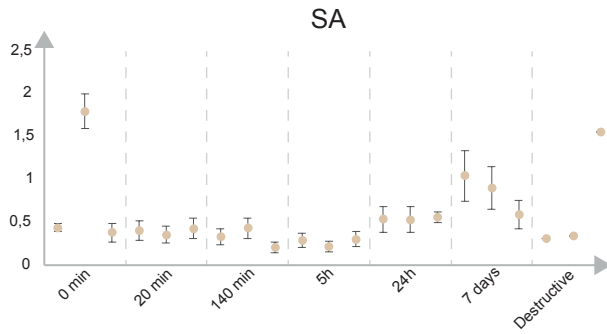

Supplement: d6lc00201c4.pdf [file d6lc00201c4.pdf]

# Evaporation time

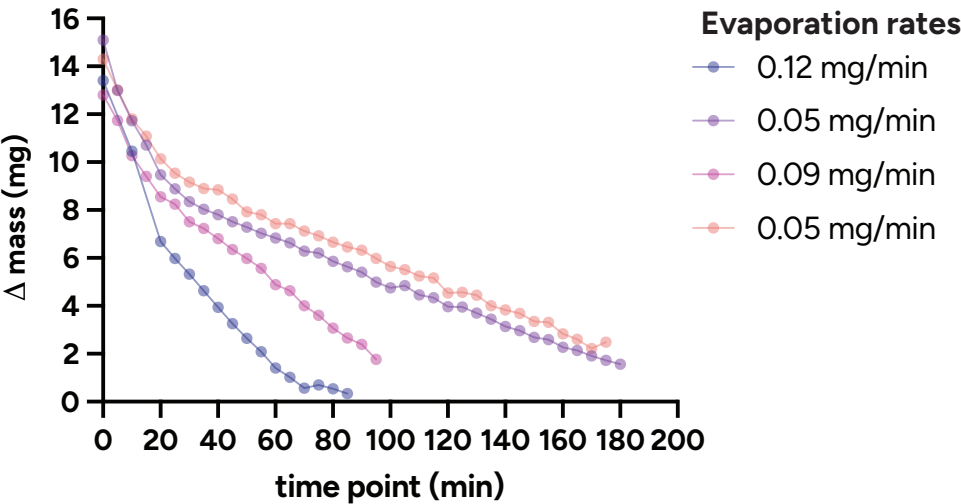

Supplement: d6lc00201c5.pdf [file d6lc00201c5.pdf]
